# Supplementary material for: Rates of Smoking Cessation at 6 and 12 Months after a Clinical Tobacco Smoking Cessation Intervention in Head and Neck Cancer Patients in Northern Ontario, Canada
Source: Curr Oncol. 2022 Mar 2;29(3):1544–58. doi: 10.3390/curroncol29030130 (PMC8947430; doi:10.3390/curroncol29030130)
Supplement: Supplementary file 1 [file curroncol-29-00130-s001.zip › curroncol-1495078-supplementary.pdf]

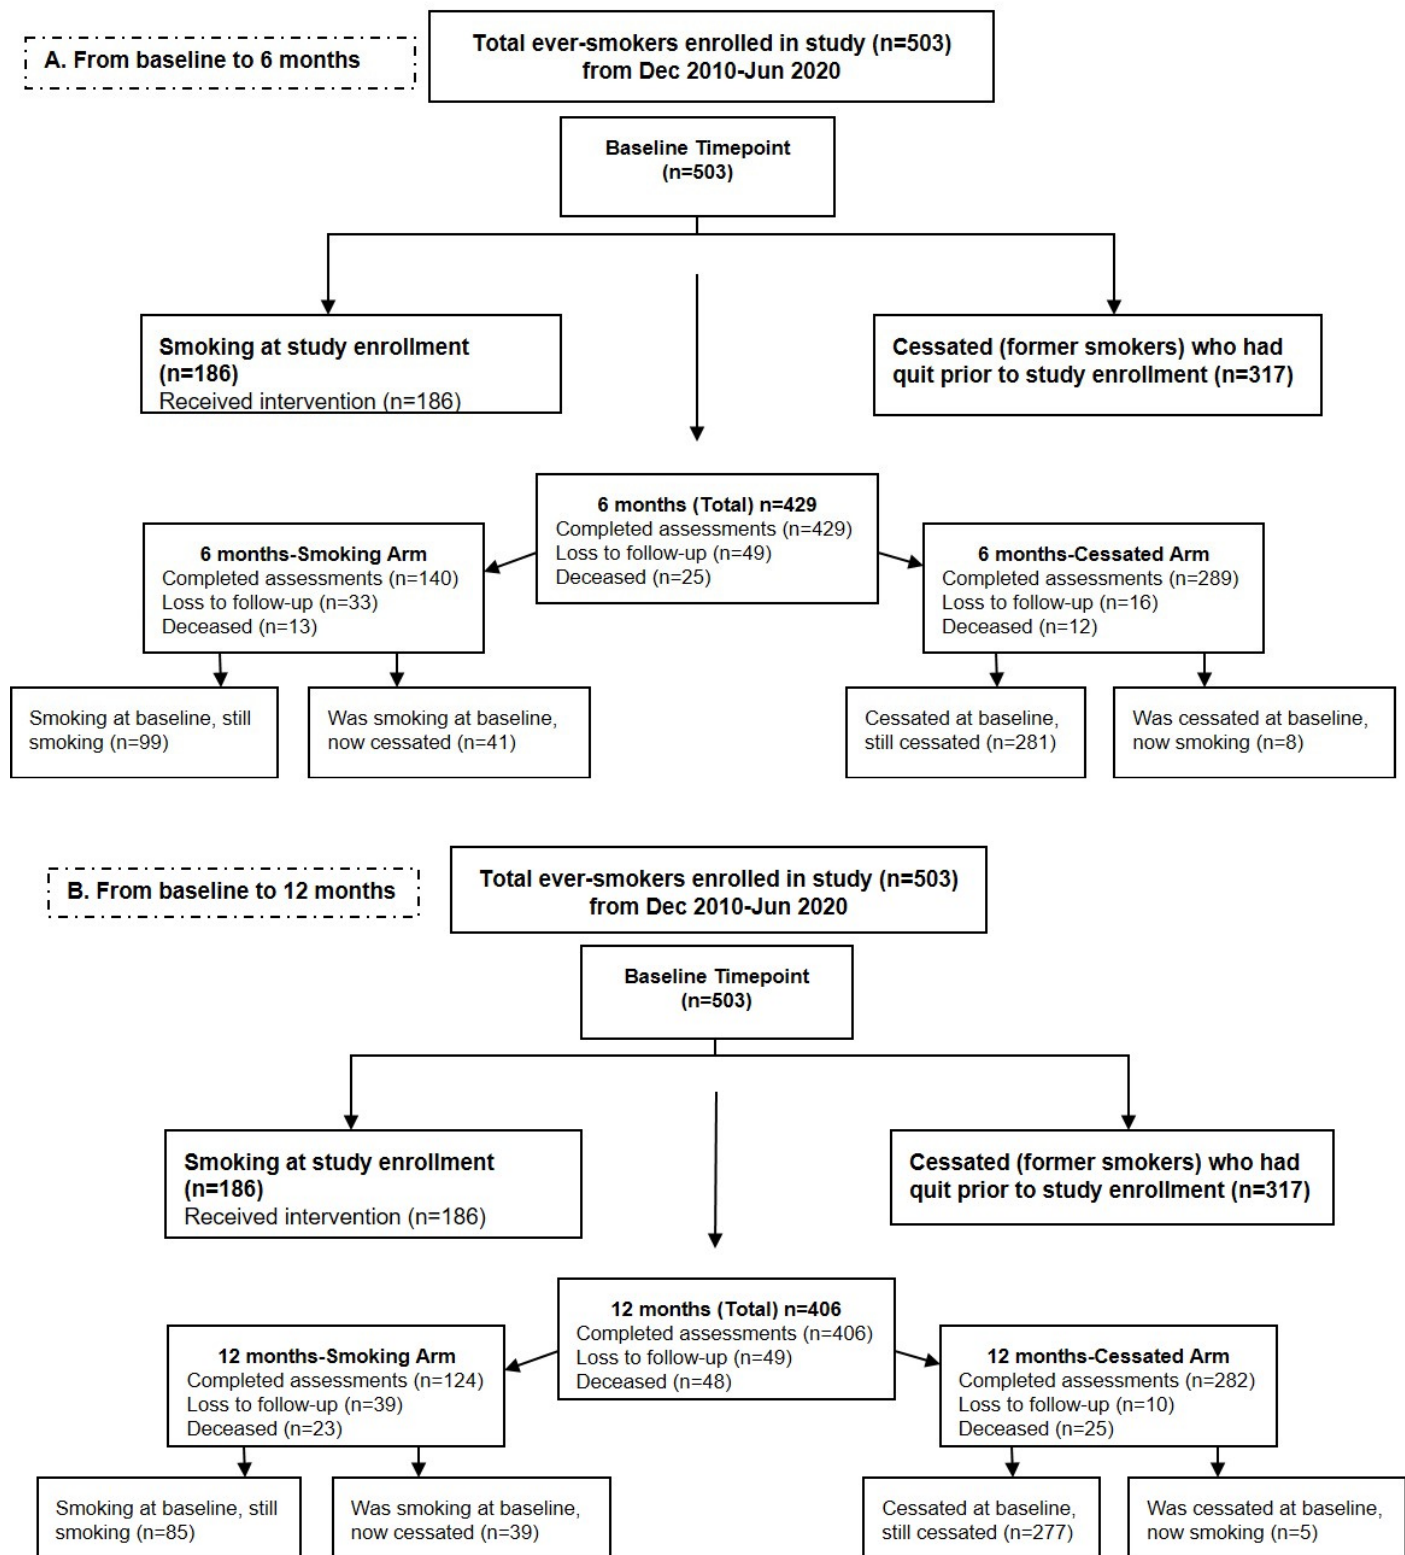

**Figure S1.** Consort Flow chart of the head and neck cancer participants (A) From baseline to 6 month follow-up (B) from baseline to 12 month follow-up.

**Table S1.** Questionnaire presented to all ever-smokers at the 6 and 12 month follow-up timepoints.

From our initial Tobacco Use Questionnaire, you indicated at that present time you:

| € Were currently smoking cigarettes                                                                                                                                  |                                                                                                                                                            | € Had completely quit smoking                                                                                                                               |                                                                                                                     |
|----------------------------------------------------------------------------------------------------------------------------------------------------------------------|------------------------------------------------------------------------------------------------------------------------------------------------------------|-------------------------------------------------------------------------------------------------------------------------------------------------------------|---------------------------------------------------------------------------------------------------------------------|
| ↓                                                                                                                                                                    |                                                                                                                                                            | ↓                                                                                                                                                           |                                                                                                                     |
| Are you still currently smoking cigarettes?                                                                                                                          |                                                                                                                                                            | Are you still completely ceased?                                                                                                                            |                                                                                                                     |
| € No                                                                                                                                                                 | € Yes                                                                                                                                                      | € No                                                                                                                                                        | € Yes                                                                                                               |
| On what date did you quit smoking?<br>_____(Date quit)                                                                                                               | How many cigarettes are you currently smoking a day<br>_____(Per/Day)                                                                                      | On what date did you start smoking again?<br>_____(Date re-started)                                                                                         | Do you have any cravings or urges to have a cigarette on a regular basis?<br><br>€ No<br>€ Yes                      |
| How many attempts did you make before you were able to successfully quit?<br>_____(Attempts)                                                                         | Have you attempted to quit since you completed the initial questionnaire<br><br>€ No<br>€ Yes                                                              | How many cigarettes per day are you currently smoking?<br>_____(Per/Day)                                                                                    | How would you rate your urge to have a cigarette?<br><br>€ Extreme urge<br>€ Moderate urge<br>€ Mild Urge<br>€ None |
| What cessation method(s) did you use in your attempts to quit smoking?<br><br>€ NRT<br>€ Champix<br>€ Zyban<br>€ Counselling<br>€ None (Cold Turkey)<br>€ Other_____ | How many attempts did you make?<br>_____(Attempts)<br><br>How long did you last before having a cigarette?<br>_____(Days)<br>_____(Months)<br>_____(Years) | What factors do you believe lead you to begin smoking again?<br><br>€ Addiction/habit<br>€ Increased stress<br>€ Being around other smokers<br>€ Other_____ | <b>Thank you,</b><br><b>Follow-up assessment complete</b>                                                           |
| Do you have any cravings or urges to have a cigarette on a regular basis?<br><br>€ No<br>€ Yes                                                                       | Are you <b>presently</b> interested in quitting smoking?<br><br>€ No<br>€ Yes                                                                              | Are you <b>presently</b> interested in quitting smoking?<br><br>€ No<br>€ Yes                                                                               |                                                                                                                     |

|                                                                                                                                                                                                 |                                                                                                                                                                                                                                                                                                                                                                             |                                                                                                                                                                                                                                                                                                                                                                             |  |
|-------------------------------------------------------------------------------------------------------------------------------------------------------------------------------------------------|-----------------------------------------------------------------------------------------------------------------------------------------------------------------------------------------------------------------------------------------------------------------------------------------------------------------------------------------------------------------------------|-----------------------------------------------------------------------------------------------------------------------------------------------------------------------------------------------------------------------------------------------------------------------------------------------------------------------------------------------------------------------------|--|
| How would you rate your urge to have a cigarette?<br><input type="radio"/> Extreme urge<br><input type="radio"/> Moderate urge<br><input type="radio"/> Mild urge<br><input type="radio"/> None | What are your <b>motivations</b> for quitting smoking?<br><input type="radio"/> Health<br><input type="radio"/> Pregnancy or baby<br><input type="radio"/> Cost of cigarettes<br><input type="radio"/> Less stress in life<br><input type="radio"/> Smoking is less acceptable nowadays<br><input type="radio"/> Other_____                                                 | What are your <b>motivations</b> for quitting smoking?<br><input type="radio"/> Health<br><input type="radio"/> Pregnancy or baby<br><input type="radio"/> Cost of cigarettes<br><input type="radio"/> Less stress in life<br><input type="radio"/> Smoking is less acceptable nowadays<br><input type="radio"/> Other_____                                                 |  |
| Thank you,<br>Follow-up assessment complete                                                                                                                                                     | Are you seriously considering quitting smoking within the next 30 days?<br><input type="radio"/> No<br><input type="radio"/> Yes                                                                                                                                                                                                                                            | Are you seriously considering quitting smoking within the next 30 days?<br><input type="radio"/> No<br><input type="radio"/> Yes<br><input type="radio"/>                                                                                                                                                                                                                   |  |
|                                                                                                                                                                                                 | Are you seriously considering quitting smoking within the next 6 months?<br><input type="radio"/> No<br><input type="radio"/> Yes                                                                                                                                                                                                                                           | Are you seriously considering quitting smoking within the next 6 months?<br><input type="radio"/> No<br><input type="radio"/> Yes                                                                                                                                                                                                                                           |  |
|                                                                                                                                                                                                 | What cessation strategies and/or products do you believe will help you successfully quit?<br><input type="radio"/> Motivational counseling<br><input type="radio"/> Motivational support from family or loved ones<br><input type="radio"/> NRT<br><input type="radio"/> Prescription medication<br><input type="radio"/> None (Cold Turkey)<br><input type="radio"/> Other | What cessation strategies and/or products do you believe will help you successfully quit?<br><input type="radio"/> Motivational counseling<br><input type="radio"/> Motivational support from family or loved ones<br><input type="radio"/> NRT<br><input type="radio"/> Prescription medication<br><input type="radio"/> None (Cold Turkey)<br><input type="radio"/> Other |  |
|                                                                                                                                                                                                 | Thank you,<br>Follow-up assessment complete                                                                                                                                                                                                                                                                                                                                 | Thank you,<br>Follow-up assessment complete                                                                                                                                                                                                                                                                                                                                 |  |

**Table S2.** Interest and motivations to quit smoking in those currently smoking who continued smoking after receiving a tobacco cessation intervention at 6 and 12 months

| <i>Baseline</i>                                                               | <i>6 months n (%)</i> | <i>12 months n (%)</i> |
|-------------------------------------------------------------------------------|-----------------------|------------------------|
| <b>Smoking (n=186)</b>                                                        | <b>Smoking (n=99)</b> | <b>Smoking (n=85)</b>  |
| <i>Present interest in quitting smoking</i>                                   |                       |                        |
| No                                                                            | 28 (28.3)             | 26 (30.6)              |
| Yes                                                                           | 70 (70.7)             | 59 (69.4)              |
| <i>Serious consideration to quit within the next 30 days</i>                  |                       |                        |
| No                                                                            | 44 (44.4)             | 42 (49.4)              |
| Yes                                                                           | 51 (51.5)             | 39 (45.9)              |
| <i>Serious consideration to quit within the next 6 months</i>                 |                       |                        |
| No                                                                            | 21 (21.2)             | 20 (23.5)              |
| Yes                                                                           | 73 (73.7)             | 60 (70.6)              |
| Missing                                                                       | 5 (5.1)               | 5 (5.9)                |
| <i>Motivations for quitting smoking</i>                                       |                       |                        |
| Health                                                                        | 74 (82.2)             | 64 (82.1)              |
| Pregnancy or baby                                                             | n/a                   | n/a                    |
| Cost of cigarettes                                                            | 6 (6.7)               | n/a                    |
| Less stress in life                                                           | n/a                   | n/a                    |
| Smoking is less acceptable today                                              | n/a                   | n/a                    |
| Other                                                                         | n/a                   | n/a                    |
| No motivation to quit                                                         | 5 (5.6)               | 11 (14.1)              |
|                                                                               | n=84; 90 responses    | n=76; 78 responses     |
| <i>Cessation strategies or products that will enable successful cessation</i> |                       |                        |
| Motivational counselling                                                      | n/a                   | n/a                    |
| Motivational support                                                          | n/a                   | n/a                    |
| Nicotine replacement therapy                                                  | 13 (12.1)             | 17 (17.5)              |
| Prescription medication                                                       | 35 (32.7)             | 35 (36.1)              |
| None ("Cold Turkey")                                                          | 43 (40.2)             | 33 (34.0)              |
| Other                                                                         | 12 (11.2)             | 10 (10.3)              |
|                                                                               | n=91; 107 responses   | n=81; 97 responses     |

Note: Cells with n<5 have been suppressed, indicated by n/a

**Table S3.** Smoking data from former or ex-smokers who were cessated at the beginning of the study who resumed smoking at the 6 month and 12 month follow-up.

| <i>Baseline</i>                                      | <i>6 months n (%)</i> | <i>12 months n (%)</i> |
|------------------------------------------------------|-----------------------|------------------------|
| <b>Cessated (n=317)</b>                              | <b>Smoking (n=8)</b>  | <b>Smoking (n=5)</b>   |
| <i>Number of cigarettes currently smoked per day</i> |                       |                        |

|                 |          |           |
|-----------------|----------|-----------|
| 0-10 cigarettes | 7 (87.5) | 5 (100.0) |
| 11 and higher   | n/a      | n/a       |

---

*Factors that lead to resumption of smoking*

|                            |                   |                  |
|----------------------------|-------------------|------------------|
| Addiction/habit            | 7 (58.3)          | 3 (60.0)         |
| Increased stress           | 5 (41.7)          | 2 (40.0)         |
| Being around other smokers | n/a               | n/a              |
| Other                      | n/a               | n/a              |
|                            | n=7; 12 responses | n=5; 5 responses |

---

*Present interest in quitting smoking*

|     |          |          |
|-----|----------|----------|
| No  | 2 (25.0) | 2 (40.0) |
| Yes | 6 (75.0) | 3 (60.0) |

---

*Serious consideration to quit within the next 30 days*

|     |          |          |
|-----|----------|----------|
| No  | 2 (25.0) | 2 (40.0) |
| Yes | 6 (75.0) | 3 (60.0) |

---

*Serious consideration to quit within the next 6 months*

|     |          |          |
|-----|----------|----------|
| No  | n/a      | n/a      |
| Yes | 7 (87.5) | 4 (80.0) |

---

*Motivations for quitting smoking*

|                                  |          |           |
|----------------------------------|----------|-----------|
| Health                           | 6 (75.0) | 4 (100.0) |
| Pregnancy or baby                | n/a      | n/a       |
| Cost of cigarettes               | n/a      | n/a       |
| Less stress in life              | n/a      | n/a       |
| Smoking is less acceptable today | n/a      | n/a       |
| Other                            | n/a      | n/a       |
| No motivation to quit            | 2 (25.0) | n/a       |

---

*Cessation strategies or products that will enable successful cessation*

|                              |                   |                  |
|------------------------------|-------------------|------------------|
| Motivational counselling     | n/a               | n/a              |
| Motivational support         | n/a               | n/a              |
| Nicotine replacement therapy | 2 (20.0)          | n/a              |
| Prescription medication      | 5 (50.0)          | 2 (40.0)         |
| None ("Cold Turkey")         | 2 (20.0)          | n/a              |
| Other                        | n/a               | 2 (40.0)         |
|                              | n=8; 10 responses | n=5; 5 responses |

---
